# Supplementary material for: Transcriptional changes are involved in phenotype switching in Streptococcus equi subspecies equi
Source: Royal Society of Chemistry journal article supplement (doi:10.1039/c5mb00780a), 2016-02-03
Supplement: c5mb00780a1.pdf [file c5mb00780a1.pdf]

**Supplementary Material:**

**Table S1.** List of primers used in this study.

| <b>Primer name</b>         | <b>Primer sequence (5' to 3')</b> |
|----------------------------|-----------------------------------|
| SEQ0546 transcript qPCR F1 | CTAGTGTAGCAGAAACAAC               |
| SEQ0546 transcript qPCR R1 | CAGCTGCACCATAATTG                 |
| SEQ0938 transcript qPCR F1 | GTATGCTAGGAATGATG                 |
| SEQ0938 transcript qPCR R1 | GCTCAGTTTGACTTAG                  |
| SEQ0999 transcript qPCR F1 | CCATATCTTGCTCATC                  |
| SEQ0999 transcript qPCR R1 | CAAACCACCAATGCAG                  |
| SEQ0269 transcript qPCR F1 | GTGTTTCAGCAGCAAACC                |
| SEQ0269 transcript qPCR R1 | CACATAGTCTTCAATGCG                |
| SEQ0270 transcript qPCR F1 | GCATATCGCCAATCAAG                 |
| SEQ0270 transcript qPCR R1 | CATTGCTATAAGCGCTTG                |
| SEQ0271 transcript qPCR F1 | CATTCAATTCATCGTCGAG               |
| SEQ0271 transcript qPCR R1 | GAGCTCGAAGTTGGAGTC                |
| SEQ1728 transcript qPCR F1 | CAGATACGTACAATACAAATGATG          |
| SEQ1728 transcript qPCR R1 | CTTCTATTATCTAAAATTTTCGTC          |
| SEQ2190 transcript qPCR F1 | GCGAAAGAGGAAGCTAAGAC              |
| SEQ2190 transcript qPCR R1 | CTTTATCAGCCGTAGCTTG               |
| SEQ0402 transcript qPCR F1 | CAGCGACTACCCTAGCAG                |
| SEQ0402 transcript qPCR R1 | CATTTTTAAGCTCGTTAGCG              |
| SEQ1817 transcript qPCR F1 | GCTCCTGCACCGAAAG                  |
| SEQ1817 transcript qPCR R1 | CTAAAGAATGGATGGCTTGC              |
| gyrA forward               | CTATGAAGCGATGGTCCGTATGG           |
| gyrA reverse               | CCATAGAACCAAAGTTTCCATGACC         |

**Table S2.** List of genes that were significantly differentially transcribed from transcriptome sequencing between the reduced capsule and mucoid colony phenotypes of *Se1691*.

| Gene ID  | Description                                                                                                    | Functional Group     | Mean fold change in reduced capsule compared to mucoid | Q value |
|----------|----------------------------------------------------------------------------------------------------------------|----------------------|--------------------------------------------------------|---------|
| SEQ_0044 | Aldehyde-alcohol dehydrogenase 2 [includes: alcohol dehydrogenase; acetaldehyde dehydrogenase] ( <i>adhE</i> ) | Nutrient metabolism  | 6.32                                                   | 0.0493  |
| SEQ_0090 | Putative collagen-like surface-anchored protein                                                                | Surface anchored     | 3.76                                                   | 0.0015  |
| SEQ_0103 | Putative membrane protein                                                                                      | Membrane protein     | 2.86                                                   | 0.0298  |
| SEQ_0203 | Putative exported protein                                                                                      | Secreted protein     | 2.31                                                   | 0.0482  |
| SEQ_0225 | Putative exported protein                                                                                      | Secreted protein     | -8.10                                                  | 0.0015  |
| SEQ_0231 | Putative Mga-like regulatory protein                                                                           | Regulator            | -3.05                                                  | 0.0015  |
| SEQ_0256 | Putative cell surface-anchored protein                                                                         | Surface anchored     | -5.99                                                  | 0.0015  |
| SEQ_0257 | Putative carbohydrate-binding exported protein                                                                 | Nutrient acquisition | -2.42                                                  | 0.0285  |
| SEQ_0269 | Hyaluronan synthase                                                                                            | Capsule production   | -4.68                                                  | 0.0015  |
| SEQ_0270 | UDP-glucose 6-dehydrogenase                                                                                    | Capsule production   | -3.95                                                  | 0.0015  |
| SEQ_0271 | UTP--glucose-1-phosphate uridylyltransferase 1                                                                 | Capsule production   | -2.21                                                  | 0.0285  |
| SEQ_0280 | Putative collagen-like cell surface-anchored protein                                                           | Surface anchored     | 4.60                                                   | 0.0433  |
| SEQ_0281 | Putative membrane protein                                                                                      | Membrane protein     | 2.39                                                   | 0.0120  |
| SEQ_0282 | Putative glucitol/sorbitol-specific phosphotransferase system (PTS), IIA component                             | Nutrient acquisition | 5.91                                                   | 0.0290  |
| SEQ_0315 | Putative N-acetylmannosamine-6-phosphate 2-epimerase                                                           | Nutrient metabolism  | -6.01                                                  | 0.0466  |

|          |                                                                           |                         |        |        |
|----------|---------------------------------------------------------------------------|-------------------------|--------|--------|
| SEQ_0316 | Sugar phosphotransferase system (PTS), IIBC component                     | Nutrient acquisition    | -3.87  | 0.0015 |
| SEQ_0317 | Putative glucose-specific phosphotransferase system (PTS), IIBC component | Nutrient acquisition    | -4.27  | 0.0015 |
| SEQ_0320 | Putative N-acetylmannosamine-6-phosphate 2-epimerase (pseudogene)         | Nutrient metabolism     | -8.22  | 0.0015 |
| SEQ_0321 | Extracellular solute-binding lipoprotein                                  | Nutrient acquisition    | -11.03 | 0.0015 |
| SEQ_0322 | Putative transport system permease                                        | Nutrient acquisition    | -10.34 | 0.0015 |
| SEQ_0323 | Putative transport system permease                                        | Nutrient acquisition    | -9.18  | 0.0015 |
| SEQ_0324 | Conserved hypothetical protein                                            | Nutrient acquisition    | -8.44  | 0.0015 |
| SEQ_0325 | Putative membrane protein                                                 | Nutrient acquisition    | -7.31  | 0.0015 |
| SEQ_0326 | Putative N-acetylneuraminate lyase                                        | Nutrient metabolism     | -7.54  | 0.0015 |
| SEQ_0327 | ROK family protein                                                        | Regulator               | -6.65  | 0.0015 |
| SEQ_0329 | Putative transcription regulator                                          | Regulator               | -7.22  | 0.0015 |
| SEQ_0350 | MerR family regulatory protein                                            | Regulator               | -8.05  | 0.0015 |
| SEQ_0351 | Putative glutamine synthetase                                             | Amino acid biosynthesis | -5.96  | 0.0015 |
| SEQ_0352 | Putative peptide binding protein                                          | Nutrient acquisition    | -6.08  | 0.0015 |
| SEQ_0353 | Di-tripeptide transport system permease protein                           | Nutrient acquisition    | -3.98  | 0.0015 |
| SEQ_0354 | Di-tripeptide transporter permease protein                                | Nutrient acquisition    | -3.90  | 0.0015 |
| SEQ_0355 | Di-tripeptide transporter ATP-binding protein                             | Nutrient acquisition    | -3.89  | 0.0015 |
| SEQ_0356 | Di-tripeptide transporter ATP-binding protein                             | Nutrient acquisition    | -3.98  | 0.0081 |
| SEQ_0377 | Putative protein F2 like fibronectin-binding protein (pseudogene) FNZ     | Secreted protein        | -3.35  | 0.0466 |
| SEQ_0378 | Putative regulatory                                                       | Regulator               | -4.32  | 0.0015 |

|          |                                                                                                       |                                     |       |        |
|----------|-------------------------------------------------------------------------------------------------------|-------------------------------------|-------|--------|
|          | protein-RofA related                                                                                  |                                     |       |        |
| SEQ_0382 | Hypothetical protein                                                                                  | Hypothetical                        | 2.28  | 0.0408 |
| SEQ_0402 | Putative cell surface-anchored protein                                                                | Surface anchored                    | 3.94  | 0.0055 |
| SEQ_0430 | Sucrose-6-phosphate hydrolase                                                                         | Nutrient metabolism                 | 2.19  | 0.0493 |
| SEQ_0490 | Putative membrane protein                                                                             | Membrane protein                    | -5.63 | 0.0015 |
| SEQ_0504 | Putative exported protein                                                                             | Secreted protein                    | -4.93 | 0.0015 |
| SEQ_0546 | Streptolysin S precursor                                                                              | Pathogenicity/adaptation/chaperones | -4.60 | 0.0015 |
| SEQ_0671 | Probable potassium transport system protein                                                           | Nutrient acquisition                | -3.59 | 0.0015 |
| SEQ_0696 | DNA/RNA non-specific endonuclease                                                                     | Pathogenicity/adaptation/chaperones | -2.21 | 0.0224 |
| SEQ_0721 | Immunoglobulin G-binding protein G precursor (IgG-binding protein G) LPXTG                            | Surface anchored                    | -2.35 | 0.0179 |
| SEQ_0817 | Hypothetical phage protein                                                                            | Phage                               | -2.14 | 0.0168 |
| SEQ_0855 | Putative collagen-like surface-anchored protein                                                       | Surface anchored                    | 4.83  | 0.0234 |
| SEQ_0862 | GntR family regulatory protein                                                                        | Regulator                           | -4.22 | 0.0015 |
| SEQ_0866 | Beta-galactosidase 3                                                                                  | Pseudogene                          | -3.83 | 0.0042 |
| SEQ_0896 | Putative exported protein                                                                             | Secreted protein                    | 3.43  | 0.0015 |
| SEQ_0931 | Putative permease                                                                                     | Nutrient acquisition                | -9.03 | 0.0015 |
| SEQ_0932 | ABC transporter ATP-binding protein                                                                   | Nutrient acquisition                | -8.97 | 0.0015 |
| SEQ_0938 | Immunoglobulin G-endopeptidase ( <i>ideS</i> ) / Mac/ Secreted immunoglobulin binding protein (Sib38) | Pathogenicity/adaptation/chaperones | 4.62  | 0.0015 |
| SEQ_0947 | Conserved hypothetical protein                                                                        | Hypothetical                        | 16.56 | 0.0015 |
| SEQ_0948 | Putative membrane protein                                                                             | Membrane protein                    | 6.46  | 0.0015 |
| SEQ_0949 | Putative exported protein                                                                             | Secreted protein                    | 15.15 | 0.0015 |
| SEQ_0950 | Conserved hypothetical protein                                                                        | Hypothetical                        | 7.80  | 0.0015 |
| SEQ_0951 | Glycosyl transferase family protein                                                                   | Glycosylation                       | 2.93  | 0.0015 |
| SEQ_0999 | <i>ideE</i> ; IgG endopeptidase                                                                       | Pathogenicity/adaptation/chaperones | 2.88  | 0.0015 |

|          |                                                                               |                                     |        |        |
|----------|-------------------------------------------------------------------------------|-------------------------------------|--------|--------|
| SEQ_1001 | Putative exported protein                                                     | Secreted protein                    | 3.63   | 0.0015 |
| SEQ_1278 | Putative surface-anchored 5'-nucleotidase                                     | Surface anchored                    | -3.66  | 0.0015 |
| SEQ_1281 | ABC transporter, ATP-binding/permease protein (pseudogene)                    | Pseudogene                          | -3.64  | 0.0043 |
| SEQ_1283 | ABC transporter, ATP-binding/permease protein                                 | Nutrient acquisition                | -3.55  | 0.0029 |
| SEQ_1291 | Mannosyl-glycoprotein endo-beta-N-acetylglucosaminidase family protein        | Nutrient acquisition                | -23.48 | 0.0015 |
| SEQ_1328 | Hypothetical protein (pseudogene)                                             | Pseudogene                          | 2.46   | 0.0015 |
| SEQ_1345 | Transport system membrane protein                                             | Nutrient acquisition                | 2.26   | 0.0068 |
| SEQ_1346 | Extracellular solute-binding protein                                          | Nutrient acquisition                | 2.40   | 0.0015 |
| SEQ_1351 | Conserved hypothetical protein                                                | Hypothetical                        | -6.75  | 0.0015 |
| SEQ_1352 | LysR family regulatory protein                                                | Regulator                           | -2.34  | 0.0029 |
| SEQ_1375 | Sugar phosphotransferase system (PTS), mannose/fructose family, IIA component | Nutrient acquisition                | 2.67   | 0.0055 |
| SEQ_1505 | Putative exported protein                                                     | Secreted protein                    | 6.32   | 0.0015 |
| SEQ_1543 | Putative exported protein                                                     | Secreted protein                    | 3.80   | 0.0015 |
| SEQ_1548 | Putative alkaline phosphatase synthesis sensor protein                        | Regulator                           | -3.40  | 0.0015 |
| SEQ_1549 | Alkaline phosphatase synthesis transcriptional regulatory protein             | Regulator                           | -3.46  | 0.0343 |
| SEQ_1654 | Conserved hypothetical protein                                                | Hypothetical                        | -3.31  | 0.0015 |
| SEQ_1661 | Metal-dependent transcriptional regulator                                     | Regulator                           | -2.11  | 0.0336 |
| SEQ_1728 | Exotoxin L precursor, <i>seeL</i>                                             | Pathogenicity/adaptation/chaperones | -4.71  | 0.0015 |
| SEQ_1768 | Putative cysteine synthase                                                    | Amino acid biosynthesis             | 2.45   | 0.0015 |
| SEQ_1800 | Putative exported protein                                                     | Secreted protein                    | -8.16  | 0.0015 |

|          |                                                  |                                     |        |        |
|----------|--------------------------------------------------|-------------------------------------|--------|--------|
| SEQ_1817 | Collagen-like surface-anchored protein           | Surface anchored                    | 4.15   | 0.0015 |
| SEQ_1821 | Putative lipoprotein                             | Nutrient acquisition                | -13.75 | 0.0015 |
| SEQ_1903 | Extracellular solute-binding protein             | Nutrient acquisition                | -2.15  | 0.0427 |
| SEQ_1941 | Putative membrane protein                        | Membrane protein                    | 3.80   | 0.0015 |
| SEQ_1949 | Putative secreted alpha-amylase                  | Nutrient acquisition                | 2.31   | 0.0317 |
| SEQ_1957 | Streptococcal histidine triad protein            | Nutrient acquisition                | -6.04  | 0.0015 |
| SEQ_1958 | Laminin binding protein                          | Nutrient acquisition                | -8.05  | 0.0015 |
| SEQ_1959 | Putative cell surface-anchored protein           | Surface anchored                    | 3.67   | 0.0015 |
| SEQ_1960 | Conserved hypothetical protein                   | Hypothetical                        | -4.55  | 0.0015 |
| SEQ_1977 | Type I restriction-modification system M protein | DNA modification                    | -2.07  | 0.0290 |
| SEQ_2010 | Thioredoxin (pseudogene)                         | Pseudogene                          | -2.95  | 0.0015 |
| SEQ_2014 | Streptokinase                                    | Pathogenicity/adaptation/chaperones | -3.52  | 0.0015 |
| SEQ_2125 | ABC transporter ATP-binding protein              | Nutrient acquisition                | -2.65  | 0.0015 |
| SEQ_2126 | Transport system permease protein                | Nutrient acquisition                | -2.33  | 0.0215 |
| SEQ_2127 | Putative lipoprotein                             | Nutrient acquisition                | -2.34  | 0.0144 |
| SEQ_2128 | Putative lipoprotein                             | Nutrient acquisition                | -2.24  | 0.0267 |
| SEQ_2180 | Putative cell surface-anchored protein           | Surface anchored                    | 4.24   | 0.0015 |
| SEQ_2190 | Putative cell surface-anchored protein           | Surface anchored                    | 4.75   | 0.0015 |
| SEQ_2196 | PadR family regulatory protein                   | Regulator                           | -8.31  | 0.0015 |
| SEQ_2197 | Hypothetical protein                             | Hypothetical                        | -6.89  | 0.0015 |
| SEQ_2198 | Hypothetical protein                             | Hypothetical                        | -5.35  | 0.0015 |
| peg 1573 | Mobile element protein                           | Phage                               | 3.62   | 0.0015 |
| peg 1265 | Hypothetical protein                             | Hypothetical                        | 5.67   | 0.0015 |
| peg 1583 | N-acetylmannosamine-6-phosphate 2-epimerase      | Nutrient metabolism                 | -6.70  | 0.0029 |
| peg 1601 | N-acetylmannosamine-6-phosphate 2-epimerase      | Nutrient metabolism                 | -17.44 | 0.0053 |

|          |                      |              |       |        |
|----------|----------------------|--------------|-------|--------|
| peg 1647 | Hypothetical protein | Hypothetical | -7.17 | 0.0015 |
| peg 1771 | Hypothetical protein | Hypothetical | -3.91 | 0.0229 |
